# Supplementary material
Source: ML conference proceedings conference paper supplement (https://proceedings.neurips.cc/paper_files/paper/2022/hash/5d2781cc34f459618a9a504761043055-Abstract.html)
Supplement: Supplementary file 1 [file 5d2781cc34f459618a9a504761043055-Supplemental-Conference.zip]

Archive with 2 entries (2 files):
- NoDiam_Appendix.pdf
- NoDiam_Checklist.pdf
